# Supplementary material
Source: publisher site journal article supplement (https://www.dovepress.com/article/273839)
Supplement: Supplementary file 1 [file get_supplementary_file.php]

**Supplementary Tables**

**Table S1: Association between medication, smoking status and education**

|  | **Education** | | | **Smoking status** | |
| --- | --- | --- | --- | --- | --- |
|  | **Basic**  **(≤9 years)** | **Secondary**  **(10–11 years)** | **Higher**  **(>11 years)** | **Ex-smoker** | **Never-smoker** |
|  |  | *OR (95 % CI)* | *OR (95 % CI)* |  | *OR (95 % CI)* |
| LABA_inh | ref. | 0.68 (0.47-0.99) | 0.82 (0.54-1.23) | ref. | 0.96 (0.65-1.42) |
| LAMA_inh | ref. | 0.99 (0.65-1.51) | 1.13 (0.71-1.81) | ref. | 1.03 (0.66-1.60) |
| ICS_inh | ref. | 0.65 (0.41-1.02) | 0.87 (0.54-1.38) | ref. | 0.97 (0.62-1.53) |
| ICS_LABA_inh | ref. | 1.12 (0.79-1.60) | 1.15 (0.78-1.70) | ref. | 0.91 (0.63-1.33) |
| Triple_inh | ref. | 0.90 (0.62-1.31) | 1.17 (0.77-1.77) | ref. | 0.83 (0.56-1.23) |
| only_ICS | ref. | 0.74 (0.14-3.81) | 0.74 (0.14-3.92) | ref. | 0.43 (0.05-3.57) |
| only_LABA or only_LAMA | ref. | 0.86 (0.55-1.32) | 0.88 (0.55-1.41) | ref. | 1.18 (0.76-1.82) |
| any_LABA | ref. | 0.77 (0.47-1.26) | 0.92 (0.53-1.59) | ref. | 0.85 (0.51-1.41) |
| any_LAMA | ref. | 0.99 (0.65-1.52) | 1.10 (0.69-1.76) | ref. | 1.00 (0.64-1.55) |
| any_ICS | ref. | 0.82 (0.55-1.21) | 1.01 (0.65-1.56) | ref. | 0.91 (0.60-1.37) |
| any_LABA_a_or_LAMA | ref. | 0.67 (0.36-1.25) | 0.90 (0.45-1.80) | ref. | 1.08 (0.55-2.11) |
| any_LABA_a_or_ICS | ref. | 0.71 (0.42-1.20) | 0.94 (0.52-1.69) | ref. | 0.84 (0.49-1.45) |
| any_LAMA_a_or_ICS | ref. | 0.82 (0.46-1.46) | 0.77 (0.42-1.41) | ref. | 1.12 (0.62-2.03) |

Logistic regression models were adjusted for age, sex, BMI and FEV1 %predicted

**Table S2 Association between all-cause mortality over 4.5 years, smoking status and education**

|  |  | **All-cause mortality over 4.5 years** | |
| --- | --- | --- | --- |
|  |  | Hazard Ratio | 95%  Confidence-Limits |
| **Age** | per 10 years | **2.77** | **[1.94 – 3.95]** |
| **Sex** | female | *ref.* |  |
|  | male | 1.41 | [0.80 – 2.49] |
| **BMI** | Normal weight | *ref.* |  |
|  | Overweight | 1.09 | [0.64 – 1.85] |
|  | Obese | 0.97 | [0.50 – 1.88] |
|  | underweight | 1.91 | [0.44 – 8.28] |
| **FEV1 % pred.** | per 10 % -point loss | **1.29** | **[1.12 – 1.49]** |
| **KHK** | yes | *1.01* | [0.58-1.74] |
| **Educationa** | Basic | *ref.* |  |
|  | Secondary | 0.83 | [0.47 – 1.48] |
|  | higher | **0.46** | **[0.22 – 0.98]** |
| **Smoking status** | Ex-smoker | *ref.* |  |
|  | Never-smoker | 0.84 | [0.45 – 1.60] |

a basic education (≤9 school years), secondary education (10–11 school years), and higher education (>11 school years). Significant associations are marked in bold (p<0.05).

**Table S3 Sensitivity analysis: Mean values of parameters by smoking status and education; duration of ex-smoking ≥ 26 years (group 3)**

|  | **Basic education** | | **Secondary education** | | **Higher education** | | **Main effects** | | **Interaction** |
| --- | --- | --- | --- | --- | --- | --- | --- | --- | --- |
|  | never smoker | ex-smoker | never smoker | ex-smoker | never smoker | ex-smoker | school | smoking | school*  smoking |
| **n** | 77 | 79 | 41 | 27 | 32 | 29 | p-value | | |
| **Lung function parameters** | | | | | | |  |  |  |
| FEV1 % pred | 48.9 | 50.4 | 52.0 | 55.0 | 60.7 | 57.6 | **0.0051** | 0.8513 | 0.6354 |
| FVC % pred | 68.9 | 71.3 | 73.9 | 72.7 | 78.4 | 79.8 | **0.0097** | 0.7512 | 0.8210 |
| FEV1/FVC (L) | 53.4 | 52.5 | 53.5 | 56.2 | 58.1 | 54.2 | 0.0929 | 0.6152 | 0.1942 |
| TLCO % pred | 62.6 | 58.7 | 62.3 | 57.7 | 64.7 | 66.1 | 0.3621 | 0.5269 | 0.7544 |
| KCO % pred | 80.1 | 72.5 | 77.8 | 73.3 | 78.3 | 78.9 | 0.7941 | 0.3145 | 0.5963 |
| RV/TLC | 0.59 | 0.61 | 0.58 | 0.58 | 0.54 | 0.54 | **0.0012** | 0.7930 | 0.8570 |
| ITGV % pred | 149.6 | 157.6 | 144.1 | 152.7 | 139.7 | 148.2 | 0.1644 | 0.0857 | 0.9977 |
| RV % pred | 172.8 | 184.6 | 165.5 | 174.8 | 157.7 | 164.5 | 0.0575 | 0.1809 | 0.9424 |
| VA % pred | 85.0 | 85.3 | 78.1 | 87.9 | 84.1 | 75.8 | 0.1362 | 0.8084 | **0.0112** |
| TLC % pred | 124.1 | 124.2 | 127.1 | 118.9 | 115.6 | 120.2 | 0.3421 | 0.7666 | 0.4289 |
| **Symptoms, health-related quality of life, exercise capacity and functioning** | | | | | | |  |  |  |
| SGRQ | 46.4 | 46.1 | 43.7 | 46.2 | 39.4 | 39.3 | 0.0774 | 0.8114 | 0.8954 |
| Activity | 62.9 | 61.5 | 60.7 | 64.5 | 47.3 | 49.9 | **0.0022** | 0.6637 | 0.7599 |
| Symptoms | 56.7 | 56.2 | 51.3 | 55.0 | 56.3 | 51.7 | 0.5350 | 0.8849 | 0.5593 |
| Impacts | 33.0 | 33.5 | 30.8 | 32.2 | 28.9 | 28.8 | 0.3576 | 0.8403 | 0.9778 |
| CAT | 19.0 | 18.9 | 17.9 | 18.8 | 16.4 | 17.3 | 0.1856 | 0.6006 | 0.8681 |
| EQ-VAS | 52.5 | 51.8 | 55.8 | 53.4 | 57.0 | 54.5 | 0.4342 | 0.5024 | 0.9313 |
| EQ-5D utility | 0.75 | 0.79 | 0.82 | 0.78 | 0.78 | 0.81 | 0.4479 | 0.6299 | 0.2511 |
| mMRC | 1.61 | 1.62 | 1.66 | 1.49 | 1.44 | 1.29 | 0.2000 | 0.4411 | 0.7553 |
| IPAQ | 3581.3 | 4642.9 | 4200.2 | 5036.0 | 3810.9 | 4443.6 | 0.8252 | 0.2871 | 0.9675 |
| 6MWD | 412.4 | 378.9 | 407.6 | 414.6 | 474.2 | 436.6 | **0.0011** | 0.1537 | 0.3723 |
| Time up and go | 6.97 | 6.80 | 6.67 | 6.59 | 6.03 | 6.27 | 0.0515 | 0.9814 | 0.8037 |
| PHQ9 | 6.37 | 6.69 | 6.63 | 7.34 | 7.09 | 7.64 | 0.3825 | 0.3621 | 0.9417 |
| ABI | 1.26 | 1.21 | 1.23 | 1.21 | 1.27 | 1.23 | 0.5533 | **0.0496** | 0.6357 |

Models were adjusted for age, sex, BMI, and time since COPD diagnosis. *marks the interaction between school and smoking. Significant associations are marked in bold (p<0.05).

**Table S4: Baseline characteristics of the study sample stratified by smoking status (excluding patients with a physician-based diagnosis of asthma)**

|  |  | **Never-Smoker** | **Ex-Smoker** |  |
| --- | --- | --- | --- | --- |
| **n** |  | 91 | 493 | p-valuea |
| **Male** |  | 46 (50.6) | 361 (73.2) | **<.0001** |
| **Age, yrs** |  | 69.8 ± 7.7 | 68.4 ± 7.7 | 0.1102 |
| **BMI categoryb** | Underweight | 1 (1.1) | 8 (1.6) | **0.0165** |
|  | Normal | 44 (48.9) | 155 (31.5) |  |
|  | Overweight | 30 (33.3) | 214 (43.5) |  |
|  | Obese | 15 (16.7) | 115 (23.4) |  |
| **Educationc** | Basic education | 50 (55.0) | 288 (58.4) | 0.6914 |
|  | Secondary education | 23 (25.3) | 135 (25.4) |  |
|  | Higher education | 18 (19.8) | 80 (16.2) |  |
| **Pulmonary function** | FEV1 % pred | 57.2 ± 18.9 | 52.3 ± 18.9 | **0.0234** |
|  | FVC % pred | 79.3 ± 20.8 | 78.2 ± 19.1 | 0.6176 |
|  | FEV1/FVC (L) | 55.1 ± 10.3 | 50.7 ± 11.1 | **0.0004** |
|  | TLCO % pred | 60.0 ± 23.8 | 56.5 ± 22.7 | 0.1985 |
|  | KCO % pred | 72.6 ± 27.0 | 66.6 ± 22.9 | **0.0295** |
|  | ITGV % pred | 142.1 ± 33.4 | 146.5 ± 38.6 | 0.3098 |
|  | RV % pred | 159.9 ± 47.0 | 167.8 ± 53.9 | 0.2023 |
|  | RV/TLC | 0.54 ± 0.11 | 0.54 ± 0.11 | 0.5808 |
|  | VA % pred | 82.7 ± 18.0 | 84.2 ± 15.2 | 0.4025 |
|  | TLC % pred | 124.9 37.0 | 115.7 ± 31.0 | **0.0132** |
| **GOLD group (mMRC)** | A | 44 (50.0) | 184 (37.6) | 0.1872 |
|  | B | 21 (23.9) | 146 (29.9) |  |
|  | C | 8 (9.1) | 58 (11.9) |  |
|  | D | 15 (17.1) | 101 (20.7) |  |
| **Severe exacerbation history** | Proportion Yes | 14 (15.4) | 93 (18.9) | 0.4305 |
|  | Mean annual rate | 1.5 ± 0.8 | 1.4 ± 0.8 | 0.7522 |
| **Years since COPD diagnosis** |  | 11.6 ± 8.6 | 10.3 ± 7.2 | 0.1260 |
| **AATD** |  | 31 (34.1) | 51 (10.3) | **<.0001** |
| **Symptoms and Quality of life** | mMRC | 1.5 ± 0.9 | 1.7 ± 0.9 | 0.1762 |
|  | SGRQ | 40.4 ± 18.9 | 43.8 ± 20.3 | 0.1512 |
|  | activity | 56.5 ± 24.4 | 60.5 ± 26.2 | 0.1851 |
|  | symptoms | 49.6 ± 21.6 | 54.1 ± 21.4 | 0.0702 |
|  | impacts | 27.7 ± 19.6 | 30.2 ± 21.0 | 0.3009 |
|  | CAT | 16.7 ± 6.9 | 17.8 ± 7.3 | 0.2155 |
|  | EQ-VAS | 57.5 ± 18.5 | 55.6 ± 19.8 | 0.4167 |
|  | EQ-5D utility | 0.85 ± 0.17 | 0.82 ± 0.19 | 0.2042 |
| **PHQ-9** |  | 4.91 ± 3.11 | 5.72 ± 4.33 | 0.0911 |
| **TUG** |  | 6.92 ± 2.01 | 7.19 ± 2.61 | 0.3763 |
| **IPAQ** |  | 4593.7 ± 4724.3 | 4419.1 ± 6288.8 | 0.8072 |
| **6MWD** |  | 428.6 ± 111.7 | 401.8 ± 107.6 | **0.0323** |
| **ABI** |  | 1.26 ± 0.12 | 1.18 ± 0.14 | **<.0001** |

Data are presented as n (%) or mean ± standard deviation

a p-value based on Chi2-test (categorical variables) and based on ANOVA (continuous variables)

b normal weight (18.5 ≤ BMI <25), overweight (25 ≤ BMI < 30), obese (BMI ≥ 30), and underweight (BMI < 18.5)

c basic education (≤9 school years), secondary education (10–11 school years), and higher education (>11 school years)

Significant differences between groups are marked in bold (p<0.05).

**Table S5: Mean values of parameters by smoking status and education (excluding patients with a physician-based diagnosis of asthma)**

|  | **Basic education** | | **Secondary education** | | **Higher education** | | **Main effects** | | **Interaction** |
| --- | --- | --- | --- | --- | --- | --- | --- | --- | --- |
|  | never smoker | ex-smoker | never smoker | ex-smoker | never smoker | ex-smoker | school | smoking | school*  smoking |
| **n** | 77 | 349 | 41 | 153 | 32 | 114 | p-value | | |
| **Lung function parameters** | | | | | | |  |  |  |
| FEV1 % pred | 52.1 | 49.1 | 52.0 | 50.0 | 63.3 | 50.6 | **0.0256** | **0.0160** | 0.1798 |
| FVC % pred | 74.4 | 75.5 | 77.0 | 78.1 | 83.5 | 76.9 | 0.1932 | 0.5477 | 0.4100 |
| FEV1/FVC (L) | 53.3 | 49.4 | 52.1 | 48.4 | 56.3 | 49.8 | 0.3213 | **0.0006** | 0.6664 |
| TLCO % pred | 59.2 | 51.1 | 54.8 | 52.0 | 58.3 | 53.7 | 0.7970 | 0.0830 | 0.6910 |
| KCO % pred | 76.0 | 61.9 | 68.8 | 63.6 | 66.3 | 67.0 | 0.6426 | **0.0419** | 0.0792 |
| RV/TLC | 0.58 | 0.58 | 0.55 | 0.57 | 0.50 | 0.57 | **0.0242** | **0.0428** | 0.1298 |
| ITGV % pred | 152.8 | 156.7 | 144.4 | 162.1 | 143.3 | 154.2 | 0.5621 | **0.0215** | 0.3811 |
| RV % pred | 176.4 | 178.2 | 162.1 | 184.8 | 157.9 | 175.8 | 0.4092 | **0.0349** | 0.2546 |
| VA % pred | 84.3 | 83.6 | 75.2 | 83.4 | 86.4 | 80.5 | 0.1241 | 0.8093 | **0.0341** |
| TLC % pred | 126.6 | 123.8 | 123.4 | 122.3 | 109.6 | 118.9 | **0.0319** | 0.6200 | 0.3405 |
| **Symptoms. health-related quality of life. exercise capacity and functioning** | | | | | | |  |  |  |
| SGRQ | 43.5 | 47.1 | 38.6 | 42.6 | 35.9 | 39.1 | **0.0296** | 0.1735 | 0.9946 |
| Activity | 61.1 | 65.7 | 56.9 | 61.0 | 46.4 | 56.8 | **0.0116** | 0.0558 | 0.7290 |
| Symptoms | 51.8 | 55.5 | 44.7 | 53.5 | 51.3 | 49.8 | 0.3012 | 0.1968 | 0.3989 |
| Impacts | 30.2 | 33.1 | 25.7 | 27.8 | 24.5 | 25.0 | 0.0622 | 0.4933 | 0.9351 |
| CAT | 18.2 | 19.2 | 16.1 | 17.5 | 15.7 | 17.3 | 0.0668 | 0.1694 | 0.9460 |
| EQ-VAS | 52.6 | 50.7 | 60.5 | 54.6 | 61.2 | 58.8 | **0.0091** | 0.1776 | 0.7553 |
| EQ-5D utility | 0.82 | 0.81 | 0.91 | 0.81 | 0.90 | 0.87 | **0.0425** | 0.0588 | 0.2236 |
| mMRC | 1.67 | 1.80 | 1.57 | 1.70 | 1.32 | 1.55 | 0.1262 | 0.1969 | 0.9401 |
| IPAQ | 4270.4 | 4096.0 | 4250.4 | 3795.5 | 4663.3 | 3643.8 | 0.9841 | 0.5031 | 0.9093 |
| 6MWD | 417.8 | 390.1 | 408.6 | 396.2 | 504.7 | 410.3 | **0.0031** | **0.0013** | 0.0667 |
| Time up and go | 6.95 | 7.13 | 6.50 | 6.93 | 5.91 | 6.75 | 0.1875 | 0.1406 | 0.6958 |
| PHQ9 | 5.79 | 6.86 | 4.62 | 6.02 | 5.06 | 5.94 | 0.1690 | 0.0393 | 0.9345 |
| ABI | 1.26 | 1.17 | 1.24 | 1.20 | 1.29 | 1.17 | 0.7598 | **<.0001** | 0.3496 |

Models were adjusted for age, sex, BMI, and time since COPD diagnosis. *marks the interaction between school and smoking. Significant associations are marked in bold (p<0.05).

**Table S6: Association between comorbidities, smoking status, and education (excluding patients with a physician-based diagnosis of asthma)**

|  | **Education** | | | **Smoking status** | |
| --- | --- | --- | --- | --- | --- |
|  | **Basic**  **(≤9 years)** | **Secondary**  **(10–11 years)** | **Higher**  **(>11 years)** | **Ex-smoker** | **Never-smoker** |
|  |  | *OR (95 % CI)* | *OR (95 % CI)* |  | *OR (95 % CI)* |
| AATD | ref. | **2.18 (1.18-4.03)** | 1.59 (0.79-3.23) | ref. | **5.67 (3.07-10.45)** |
| Diabetes | ref. | 0.78 (0.42-1.44) | 0.58 (0.28-1.21) | ref. | 0.66 (0.29-1.49) |
| Hypertension | ref. | 1.28 (0.83-1.96) | 0.99 (0.62-1.59) | ref. | 0.94 (0.58-1.53) |
| KHK | ref. | 0.63 (0.36-1.08) | 0.73 (0.41-1.32) | ref. | 0.72 (0.37-1.38) |
| Bronchiectasis | ref. | 0.90 (0.31-2.65) | 0.90 (0.31-2.65) | ref. | **6.18 (2.64-14.47)** |
| Hyperuricemia | ref. | 0.67 (0.38-1.16) | 0.57 (0.30-1.09) | ref. | 0.50 (0.24-1.06) |
| HLP | ref. | 0.85 (0.56-1.27) | 0.70 (0.44-1.12) | ref. | 0.81 (0.50-1.30) |
| Osteoporosis | ref. | 0.66 (0.38-1.16) | 0.82 (0.43-1.56) | ref. | 1.14 (0.63-2.06) |
| GI | ref. | 0.85 (0.57-1.26) | 0.75 (0.47-1.19) | ref. | 0.89 (0.56-1.41) |

Logistic regression models were adjusted for age, sex, and BMI (estimates not shown). Significant associations are marked in bold (p<0.05).

**Table S7 Association between all-cause mortality over 4.5 years, smoking status and education (excluding patients with a physician-based diagnosis of asthma)**

|  |  | **All-cause mortality over 4.5 years** | |
| --- | --- | --- | --- |
|  |  | Hazard Ratio | 95%  Confidence-Limits |
| **Age** | per 10 years | **2.65** | **[1.77 – 3.98]** |
| **Sex** | female | *ref.* |  |
|  | male | **2.28** | **[1.03 – 5.03]** |
| **BMI** | Normal weight | *ref.* |  |
|  | Overweight | 0.98 | [0.53 – 1.78] |
|  | Obese | 0 84 | [0.40 – 1.77] |
|  | underweight | 1.78 | [0.23 – 13.78] |
| **FEV1 % pred.** | per 10 % -point loss | **1.30** | **[1.11 – 1.52]** |
| **KHK** | yes | 1.01 | [0.55 – 1.84] |
| **Educationa** | Basic | *ref.* |  |
|  | Secondary | 0.86 | [0.44 – 1.67] |
|  | higher | 0.52 | [0.22 – 1.25] |
| **Smoking status** | Ex-smoker | *ref.* |  |
|  | Never-smoker | 0.63 | [0.25 – 1.60] |

a basic education (≤9 school years), secondary education (10–11 school years), and higher education (>11 school years). Significant associations are marked in bold (p<0.05).
